# Supplementary material for: Detection and attribution of global change effects on river nutrient dynamics in a large Mediterranean basin
Source: Copernicus journal article supplement (doi:10.5194/bg-12-4085-2015), 2015-07-07

Supplement of Biogeosciences, 12, 4085–4098, 2015  
<http://www.biogeosciences.net/12/4085/2015/>  
doi:10.5194/bg-12-4085-2015-supplement  
© Author(s) 2015. CC Attribution 3.0 License.

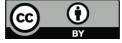

*Supplement of*

## **Detection and attribution of global change effects on river nutrient dynamics in a large Mediterranean basin**

**R. Aguilera et al.**

*Correspondence to:* R. Aguilera (raguilera@icra.cat)

The copyright of individual parts of the supplement might differ from the CC-BY 3.0 licence.

# Detection and attribution of global change effects on river nutrient dynamics in a large Mediterranean basin

R. Aguilera, R. Marcé, and S. Sabater

## Supplementary Material

**Section S.1.** Nitrate and phosphate fluxes at selected downstream and upstream sampling points.

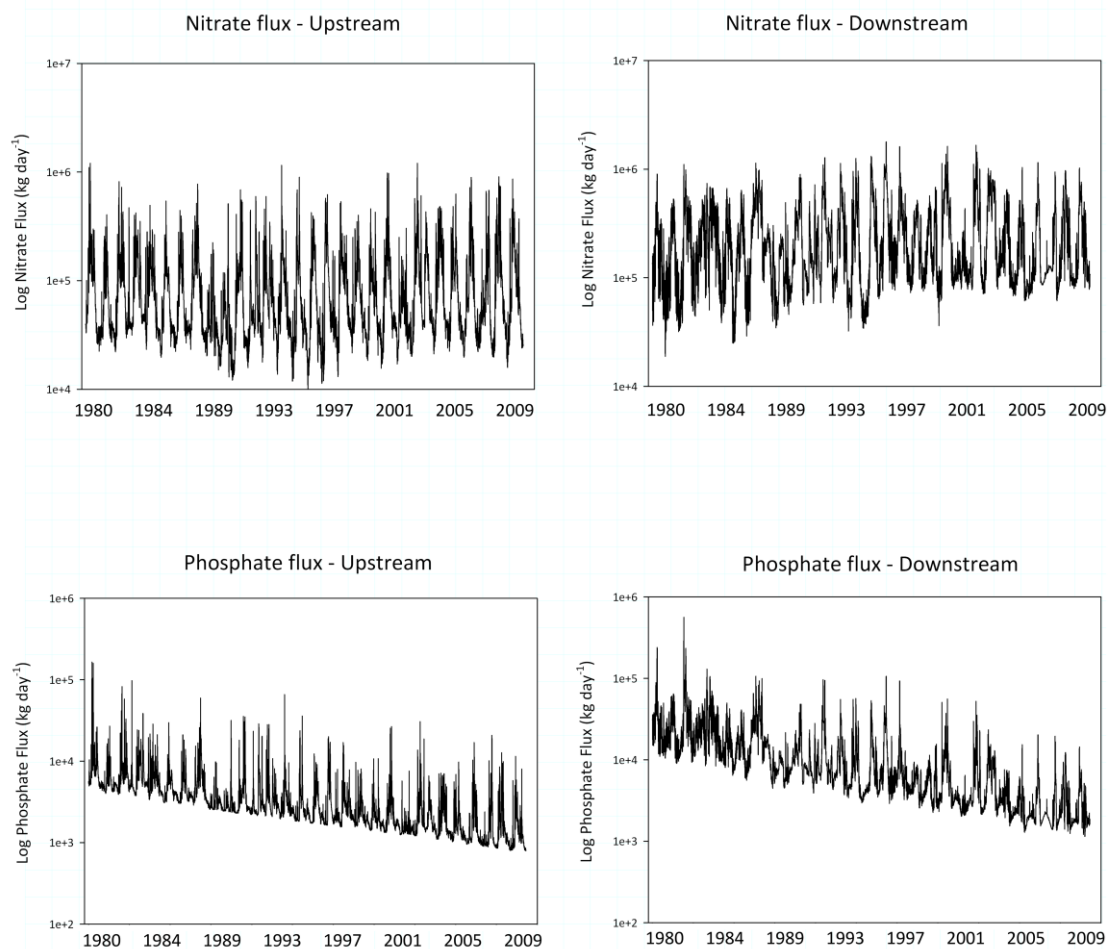

**Section 5.2.** Common streamflow patterns extracted from a set of 37 time-series by means of Dynamic Factor Analysis

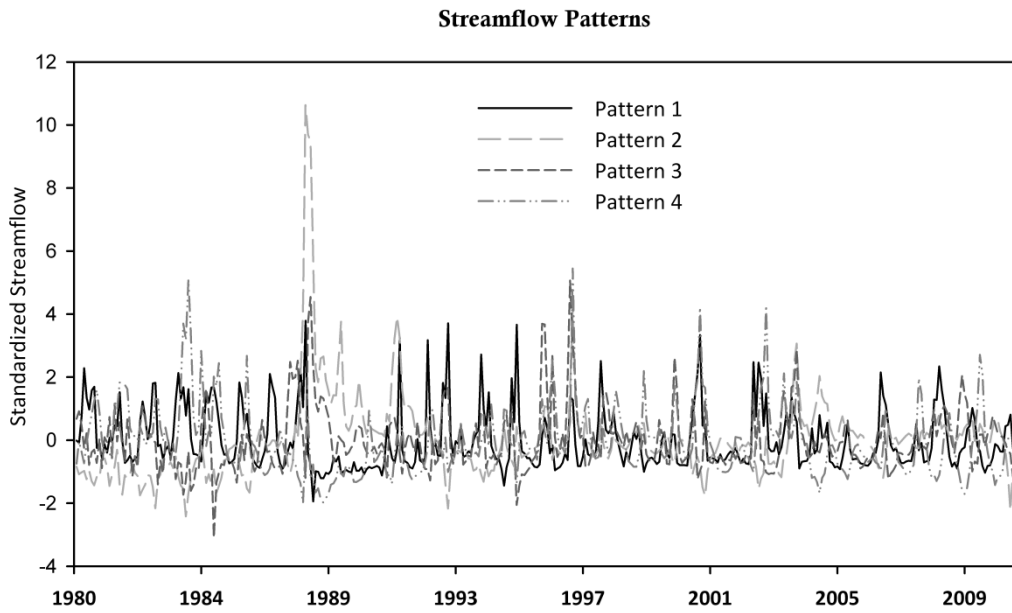

**Section 5.3.** Common mean air temperature patterns extracted from a set of 50 time-series by means of Dynamic Factor Analysis

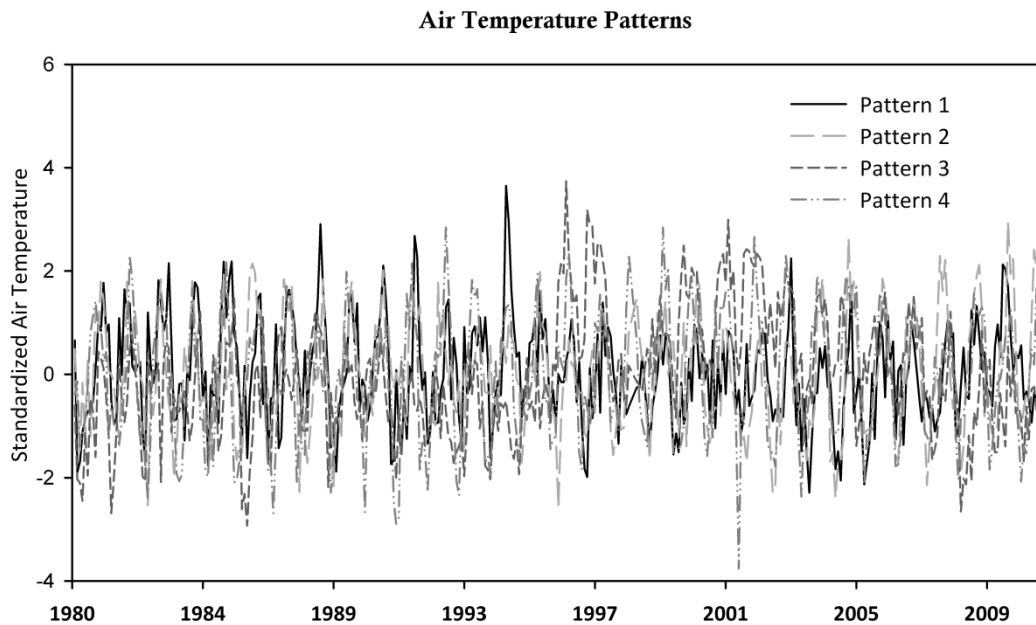

Supplement: Supplementary file 1 [file bg-12-4085-2015-supplement.pdf]
